# Supplementary material
Source: MDPI journal article supplement (https://www.mdpi.com/2073-4441/15/8/1620)
Supplement: s1 [file s1]

Archive with 3 entries (3 files):
- Figures S1-S2.pptx
- Table S1.xlsx
- Tables S2-S4.pdf
