# Supplementary material
Source: MDPI journal article supplement (https://www.mdpi.com/2073-4441/15/8/1620)
Supplement: s1 [file s1 › Table S1.xlsx]

## Sheet: Table S1
Table S1. Comparison between studies that use inequality indices based on Lorenz Curve and Dissimilarity Index to analyze drinking water access inequalities.
Author(s)	Agenda	Study Area	Region	Income Level	Scale	Unit of Analysis	Year	Time Periods	Objectives	Urban/ Rural	Wealth Groups	Water Access Criteria	WHO/UNICEF JMP WASH Criteria	Drinking Water Aspects	Water Access Variables	Inequalities Indicators / Index	Inequality Class Breaks	Data Source
Wang et al. (2012)	No	Yellow River	China	Upper middle income	River	Population	1999-2006	Yes (8 time periods)	A model has been proposed and developed for calculating the Gini coefficient for water use to measure the equality level in water supply.	Yes (quota of domestic water use)	No	Domestic water use.		Access Quantity (domestic water use)	Cumulative share of domestic water use.	(i) Gini Index	Baseline of 0,4	China water resources bulletins Yellow River water resources bulletins
Yang et al. (2013)	Millennium Development Goals (MDG)	Blangadesh/ Ethiopia/ Jordan/ Nicaragua/ Nigeria/ Peru/ Tajikistan/ Peru	Worldwide		Country	Quintiles (Households Members)	2000-2007	No	Examine how patterns of inequality in safe water access are affected by the definition of safe water that is used.	No	Quintiles	Use of an improved source, and use of an improved source (WHO/UNICEF JMP methodology) combined with measured water safety.	X	Access Quality	Population with improved water source. Population with improved water source compliant for chemical and microbial water quality parameters.	(i) Concentration Coefficient	No	Demographic and Health Surveys (DHS) Rapid Assessment of Drinking-Water Quality (RADWQ) project
Pullan et al. (2014)	Millennium Development Goals (MDG)	41 Countries	Sub-Saharan Africa (SSA)	Low and middle income	Country, sub-national administrative area	Admintrative Area	2012	No	Combine multiple national surveys using spatial statistical methods to investigate differences in use of improved drinking water, improved sanitation, and open defecation at small spatial scales; identify specific geographical areas where coverage is substantially worse than national averages; and explore relative geographic inequalities within countries.	Yes	Quintiles	Improved sources of drinking water: piped water into the dwelling; piped water to yard/plot/compound; public tap or standpipe; tubewell or borewell; protected dug well; protected spring; rainwater. Improved (‘‘safe’’) drinking-water sources are defined as those that are ‘‘protected from outside contamination (especially faecal contami- nation).’’ Accessible, improved drinking water source: an imp…	X	Access	Cumulative proportion of use ranked by administrative areas' share of national use.	(i) Gini Index (ii) Relative geographic inequality (RGI) index	No	National household cluster-sample surveys undertaken as part of multiple indicator cluster surveys (MICS) Demogaphic and Health Surveys (DHS) National malaria and AIDS indicator surveys (MIS/AIS) Living standard measurement studies (LSMS)
Yu et al. (2014)	Millennium Development Goals (MDG)	Colombia, South Africa, Egypt, Uganda and Kenya	Latin America & Caribbean Sub-Saharan Africa Middle East & North Africa	Low, upper and lower middle income	Country, province, district, sub-district	Population (area units)	2001-2009	No	The study also aims to understand the issues and potential limitations surrounding the application of the dissimilarity index and its variants to water and sanita- tion access. It also aims to assess the potential role of cen- sus data in understanding geographic inequalities relating to water and sanitation.	Yes	No	Classified sources following the JMP classification as far as possible: ‘Preferred’ water access categories. ‘Restricted’ water access categories.	X	Access	Population without acccess to water. Population with access to these services.	(i) Dissimilarity Index	No	National Census Uganda: water source inventory data (Directorate of Water Development)
Berthe (2016)	Millennium Development Goals (MDG)	Brazil	Latin America	Upper middle income	Country, regions, states	Population (Individuals/ Hoseholds)	2008/2009	No	Propose methods to equity assess in water and sanitation services distribution based on study of North and Northeast' regions of Brazil .	Yes	No	The water used in the house comes from: general water distribution network, well or others. How do you assess the housing conditions relating to the water service? Good, bad or does not know/not concerned.		Access Quality of Services	Cumulative share of indicator developed by research.	(i) Gini Index (ii) Concentration Coefficient (iii) Theil Index	No	Consumer Expenditure Survey (POF) by Brazilian Institute of Geography and Statistics (IBGE)
Chaudhuri and Roy (2017)	Sustainable Development Goals (SDG)	India	South Asia	Lower middle income	National, district, state	Households	2011	No	Map nationwide rural-urban spatial inequalities for various WASH infrastructural facilities along a four-tier administrative hierarchy: household-district-state-national.	Yes	No	Access to (a) treated tap water, (b) improved water, (c) at-home water source.		Access	District-wise percentage of households having particular WASH parameter value.	(i) Rural-urban Arithmetic Difference (ii) Spatial Autocorrelation (Moran's I and LISA) (iii) Bray-Curtis Dissimilarity Index (BCI) (iv) Agglomerative Hierarchical Cluster Analysis (AHC) (v) Gini Index	G < 0.40: reasonable equity G > 0.40: high inequality G > 0.50: starkly inequal	National Census
Guragai et al. (2017)	Millennium Development Goals (MDG) (Indirect)	Kathmandu Valley (KV) (Nepal)	South Asia	Lower middle income	Service areas	Consumers	2015	No	The objectives of this study were to assess the prevalence of intermittent water supply in the KV using supply hours and supply frequency as measures of intermittent water supply, and to graphically express and quantify the supply inequality of piped water in the KV.	No	No	Piped water supply (major source by volume, frequency, and duration of piped water supply; supply regularity; perceived service levels and piped water tariff; perceived problems and expected improvements).		Access Availability (duration)	Cumulative proportion of supply hours.	(i) Gini Index	No	Questionnaire Survey
Malakar and Mishra (2017)	No	30 Countries	Worldwide		Country	Country	2002	No	Aims to assess the inequality in water use through some indices (Gini and Theil) that are widely used for quantification of inequality in other fields.	No	Capita gross national income (GNI)	The per capita water use data considered in the study are only inclusive of domestic water use from formal sources, not consider water tapped from other sources such as well, groundwater, river, etc.		Access Quantity (consumption per capita)	Cumulative percentage of total water use (liters per day).	(i) Gini Index (ii) Theil Index	No	United Nations Development Programme (2006) World Bank database
Roche, Bain and Cumming (2017)	Millennium Development Goals (MDG) Sustainable Development Goals (SDG)	25 countries	Sub-Saharan Africa (SSA)	Low and middle income	Countries	Population	2010–2014	No	Aims of this study are to estimate the prevalence of‘combined MDG coverage’ (water and sanitation) and ‘combined basic SDG coverage’ (water with collection time under 30 minutes plus sanitation and hygiene) in SSA, and to investigate how these vary by urban/rural location and socio-economic status.	Yes	Quintiles	Improved water and sanitation were used as defined by the JMP for the MDG targets, with certain adjustments. Basic improved water access: the time it takes for a round trip to collect water must be less than 30 minutes.	X	Access	Cumulative population with MDG or/and SDG coverage.	(i) Percentage point differences and ratios (ii) Concentration Coefficient	No	WHO/UNICEF JMP Demographic and Health Surveys (DHS) Multiple Indicator Cluster Surveys (MICS)
Cole et al. (2018)	Sustainable Development Goals (SDG)	África do Sul	Sub-Saharan Africa (SSA)	Upper middle income	National, provincial, district, municipal, town	Population (wards)	2007/2008 2011	No	The current state of water inequality in South Africa is assessed, providing a case study of SDG data disaggregation and reporting, and supporting more effective policy-making.	Yes	Deciles	Piped water access in dwelling.		Access Quantity (consumption per capita)	Cumultive proportion of persons with piped water access. Cumulative distribution of water use.	(i) Gini Index (ii) Palma Ratio	No	Statistics South Africa (StatsSA) General Household Survey (GHS) National Census
Malakar, Mishra and Patwardhan (2018)	Millennium Development Goals (MDG)	India	South Asia	Lower middle income	National, Regions	Cities/ States	1991/ 2001/ 2011	Yes (3 time periods)	To demonstrate the use of Lorenz curve, Gini coefficient, and Theil index as a measure of inequality in water supply in different cities of India. To show the use of modified Lorenz curve and Theil index to estimate the inequality in coverage of water supply in different states of India at three time periods 1991, 2001, and 2011.	Yes	Economic cities groups	Access to tap water. Per capita water supply data are only inclusive of water supplied by various state agencies. It does not include groundwater and other private water supply. The data are in terms of litres per capita per day (lpcd).		Access Quantity (consumption per capita)	Cumulative percentage of households having tap water. Cumulative percentage of water supply (liters per day).	(i) Gini Index (ii) Theil Index	No	Rajya Sabha Unstarred Question No. 527 National Census
Morales-Novelo et al.(2018)	No	México	Latin America	Upper middle income	Municipal	Quintile (Households)	2010 2011	No	Measure the inequality in the distribution of drinking water and water subsidies between households connected to the public network of Mexico City in order to generate objective indicators of the phenomenon.	No	Quintiles	Water consumption by water supply network.		Quantity (household consumption) Affordability	Cumulative % of subsidy. Cumulative % of water consumption.	(i) Concentration Coefficient	No	Survey on Consumption Habits Service and Quality of Water by Household in Mexico City (EHCSCA) National Census
He et al. (2018)	Sustainable Development Goals (SDG)	Nepal	South Asia	Lower middle income	Country, provinces, districts	Households	2011	No	Explore heterogeneity and inequality in access to improved drinking-water supply and sanitation across Nepal by map and administrative levels to prioritize resource allocation and policy-making.	No	No	An improved drinking-water source was defined as being “protected from outside contamination (especially fecal contamination). (1) Piped water into dwelling, yard or plot, (2) Public tap or stand- pipe, (3) Tubewell or borehole, (4) Protected spring, (5) Protected dug well, (6) Rainwater collection.	X	Access	(not described)	(i) Gini Index (ii) Theil T and L indexes (iii) Relative Geographical Inequality Index (RGI)	G ≤ 0,3: comparatively fair 0,3 < G ≤ 0,4: warning limit G > 0,4: inequality	Nepal Demographic and Health Survey (DHS)
Fuller and Dwivedi (2019)	Millennium Development Goals (MDG)	218 countries	Worldwide		Global	Country	2000 2015	Yes (2 time periods)	This study analyzes the progress made during the implementation phase of the MDGs at the global level based on an analysis that uses country-level data for eight selected development indicators.	No	Income groups	Access to improved water sources.		Access	Percent of people using at least basic water services	(i) Gini Index	No	UN database World Development Indicators Database/ World Bank
Babuna, Yang e Bian (2020)	No	35 cities Yangtze River Economic Delta (China)	East Asia & Pacific	Upper middle income	Cities	Population (domestic water users)	2015	No	The specific objectives of the study are: • to calculate inequality in water use; • to calculate the water use efficiency of cities in the YRED; • to categorize cities into types concerning the spatial spread of inequality.	No	Quintiles	Domestic water comprises urban domestic and rural domestic, which together makes-up residential water, water in the construction industry, as well as tertiary water.		Access Quantity (domestic water use)	Water consumption.	(i) Gini Index (ii) Global Moran's Index	G < 0,2: high equality 0,2 ≤ G < 0,3:relative equality 0,3 ≤ G < 0,4:neutrality 0,4 ≤ G < 0,5:relative inequality G ≥ 0,5: high inequality	Water Resources Planning and Management Department in the local government of cities China National Water Resources Bulletin
Bayu et al. (2020)	Sustainable Development Goals (SDG)	82 developing countries	Worldwide		Country	Quintiles	2016 2017	No	Investigates and quantifies the inequality of access to water and sanitation in developing countries. Study the links between water governance factors and the inequality of access to water and sanitation.	No	Quintiles	Drinking water from an improved source (piped water, boreholes or tubewells, protected dug wells, protected springs, rainwater, and packaged or delivered water), provided collection time is not more than 30 minutes for a roundtrip including queuing.	X	Access	Cumulative % population access to basic service.	(i) Gini Index	No	WHO and UNICEF Joint Monitoring Programme (JMP)
Cetrulo et al.(2020)	Sustainable Development Goals (SDG)	Brasil	Latin America	Upper middle income	National, regional, principal cities	Population	2000 2010	Yes (2 time periods)	This research proposes a basis for a deeper analysis of the indicator 6.1.1 of the SDG and the possible adaptations of the indicator to better monitor and report inequality in access to water	No	Quintiles Deciles	Lack of access to water (tank, rainwater not stored in a cistern, water truck, river dam, lake, well or spring outside the property).		Access	Cumulative percentage of population without access to water.	(i) Concentration Coefficient (ii) Dissimilarity Index (iii) Generalized Entropy Measures (Theil Index, Mean Logarithmic Deviation, Square Coefficient Variation) (iv) Atkinson's Inequality Measures	No	National Census
Indra et al. (2020)	No	Indonesia	East Asia & Pacific	Lower middle income	Country	Population (school-aged children)	2002 2012	Yes (11 time periods)	The purpose of this paper is to analyze the inequality of opportunity among Indonesian school- age children from 2002 to 2012. It focuses on the possibilities of accessing basic needs, such as primary education, secondary education, electricity and clean water.	Yes	Household Income	Clean water is defined as the water obtained from the packaging or refill water, tap water, well pumps, protected wells and protected springs.		Access	Predicted coverage rates (probability of access to clean water).	(i) Dissimilarity Index (ii) Human Opportunity Index (iii) Shapley decomposition	No	National Household Survey (SUSENAS)
Queiroz et al. (2020)	Sustainable Development Goals (SDG)	Latin America and the Caribbean	Latin America and Caribbean	Lower and upper middle income	Country	Households	2018	No	Address inequalities in analyses of access to water and sanitation services, adjusting the indicator of access to these services according to inequality, assessment of intersecting forms of inequality.	Yes	Indirect measures	Piped water within the household.		Access	Access to services estimated by means of logistic regression in which the binary response variables are piped water within the household (against no piped water).	(i) Dissimilarity Index	No	IPUMS-International project
Cha et al. (2021)	Sustainable Development Goals (SDG)	Sudan	Sub-Saharan Africa	Low income	Country, state, district	Schools and households (students interviews)	2016/2017	No	Explore spatial heterogeneity and inequality in access to improved water and sanitation across Sudan by mapping the coverage at both the state and district levels.	No	No	Water pipe connection into a dwelling, yard, or plot; a public tap or standpipe; a tube well or borehole; and a protected dug-well or hand-pump for improved water.	X	Access	Cumulative proportion of use of administrative areas, ranked by their share of national use.	(i) Gini Index (ii) Theil T and L indexes	G < 0,3: comparatively fair 0,3 ≤ G < 0,4: warning sign G ≥ 0,4: considerable inequality	Nationwide water, sanitation, and hygiene survey under SUKO project (Sudan and Korea Collaboration Project of Schistosomiasis and other Intestinal Helminthiases Control)
Hernández-Vasquéz et al. (2021)	Sustainable Development Goals (SDG)	Peru	Latin America	Upper middle income	Country, natural regions, cities agruped by size	Households and population (socioecoenomic characteristics and city size groups)	2008 2018	Yes (2 time periods)	Describe and estimate, according to city size, socioeconomic inequalities in access to safe drinking water in Peruvian households from 2008 to 2018.	Only urban	Quintiles	Access to safe drinking water determined based on the presence of chlorinated water supplied by public network.		Access Quality	Cumulative % population with access to safe drinking water.	(i) Concentration Curves (CC) and Erreygers Concentration Index (ECI)	No	Encuesta Nacional de Hogares (ENAHO) Instituto Nacional de Estadística e Informática (INEI)
Oskam et al. (2021)	Sustainable Development Goals (SDG)	South Africa	Sub-Saharan Africa	Upper middle income	Country, provinces	Population (households informal settlements)	2015	No	This study aimed at assessing socio-economic inequalities in access to drinking water among inhabitants of informal settlements in South Africa.	No	Quintiles	Four categories were distinguished based on both the type of drinking water source and the distance from the user’s dwelling to the drinking water source: (1) piped tap water in the dwelling or on-site (hereafter referred to as “piped tap on property”), (2) public tap water at a distance less than 200 m from the dwelling (hereafter referred to as “nearby public tap”), (3) public tap water at a di…		Access	Cumulative percentage of households using the types of drinking water.	(i) Means of Multinomial Logistic Regression (ii) Concentration Curve and Coefficient	No	“The baseline study for future impact evaluation for informal settlements targeted for upgrading in South Africa,” a cross-sectional study conducted by the Human Sciences Research Council (HSRC)
Tasbasi (2021)	No	Bulgaria	Europe & Central Asia	Upper middle income	Regions, Nomenclature of Territorial Units for Statistics (NUTS)	Population	2010 2017	Yes (2 time periods)	The relationship between income and water demand is further investigated empirically and the demographic effects on this relationship are also diagnosed. The local dissimilarity index is calculated in order to provide spatial separation for different income groups in access to water.	No	No	Piped water supply.		Access	Number of people with or without access to water in area.	(i) Dissimilarity Index	No	National Statistical Institute
Yu et al. (2021)	Sustainable Development Goals (SDG)	Malawi, Nepal, Nigeria, Pakistan and Uganda	Sub-Saharan Africa South Asia	Low and lower middle income	Country, administrative level 2	Population	2015-2018	No	The main objectives of this study are (1) to produce geo- spatially explicit estimates of basic hygiene prevalence across the case study countries; (2) to examine the applicability of the ensemble ma- chine learning model for such applications; (3) to examine the relative importance of covariates for predicting basic hygiene services; and (4) to quantify geographic disparities in access to basic …	Yes	No	Population living in a household with an observed place for handwashing where both water and soap are available.	X	Access	Predicted prevalence of basic hygiene coverage.	(i) Dissimilarity Index	No	DHS Program portal
Alfonso, Kazama and Takizawa (2022)	Sustainable Development Goals (SDG)	Quezon City (Philippines)	East Asia & Pacific	Lower middle income	Municipal, village	Quintiles (Respondents)	2021	No	Delineate the relationship between the inhabitants' socio-economic status — particularly income disparity — and inequality of access to safely managed water, that is, consumption of and expenditure on water, in the urban areas of the Philippines.	Only urban	Quintiles	Water sources of each household for drinking and other daily activities: piped water, water refilling stations (locally abundant private entities treating/purifying usually piped water as feed water and resell it per container), water vendors who resell piped water to consumers who do not own piped water connection, and others (dug wells, hand pumps and rainwater).	X	Access Quantity (per capita consumption) Affordability	Cumulative proportion of water consumption. Cumulative proportion of water expenditure.	(i) Gini Index	G > 0,2: significant difference in water consumption levels	Interview survey
Babuna et al. (2023)	No	Ghana	Sub-Saharan Africa	Lower middle income	Regions	Population	2013-2021	Yes	Mathematically model Water Inequality and Water Security, discuss the relationship between the two parameters, and submit the role of Water Governance.	No	No	Domestic water use.		Access Quantity (domestic water use)	Water consumption.	(i) Gini Index (ii) Global Moran's Index	G < 0,2: high equality 0,2 ≤ G < 0,3:relative equality 0,3 ≤ G < 0,4:neutrality 0,4 ≤ G < 0,5:relative inequality G ≥ 0,5: high inequality	United Nations Food and Agriculture AQUASTAT database Worldometer Statistical Services Department
