# Supplementary material
Source: MDPI journal article supplement (https://www.mdpi.com/2073-4441/15/8/1620)
Supplement: s1 [file s1 › Tables S2-S4.pdf]

**Table S2.** Adapted Saaty scale [39].

| Ranking | Definition                                        |
|---------|---------------------------------------------------|
| 1       | Both features are equally important.              |
| 2       | Between 1 and 3.                                  |
| 3       | One of the features is a little more important.   |
| 4       | Between 3 and 5.                                  |
| 5       | One of the features is moderately more important. |
| 6       | Between 5 and 7.                                  |
| 7       | One of the features is strongly more important.   |
| 8       | Between 7 and 9.                                  |
| 9       | One of the features is absolutely most important. |

**Table S3.** Pairwise comparisons between sub-criteria and weights of the AHP Method.

|                                                        | Distance and travel time to access | Sufficient access (quantity) to meet basic needs | Duration and intermittency of access | Access without microbiological contamination (E. coli) | Potable water guarantee |
|--------------------------------------------------------|------------------------------------|--------------------------------------------------|--------------------------------------|--------------------------------------------------------|-------------------------|
| Distance and travel time to access                     | 1                                  | 1/5                                              | 5                                    | 1/5                                                    | 1/5                     |
| Sufficient access (quantity) to meet basic needs       | 5                                  | 1                                                | 7                                    | 1                                                      | 3                       |
| Duration and intermittency of access                   | 1/5                                | 1/7                                              | 1                                    | 1/7                                                    | 1/7                     |
| Access without microbiological contamination (E. coli) | 5                                  | 1                                                | 7                                    | 1                                                      | 3                       |
| Potable water guarantee                                | 5                                  | 1/3                                              | 7                                    | 1/3                                                    | 1                       |

**Table S4.** Pairwise comparisons between water sources for each sub-criterion of the AHP Method.

| Distance and travel time to access.              | Piped water | Well or spring on household | Rainwater Cisterns | Others |
|--------------------------------------------------|-------------|-----------------------------|--------------------|--------|
| Piped water                                      | 1           | 3                           | 1                  | 9      |
| Well or spring on household                      | 1/3         | 1                           | 1/3                | 7      |
| Rainwater Cisterns                               | 1           | 3                           | 1                  | 9      |
| Others                                           | 1/9         | 1/7                         | 1/9                | 1      |
| Sufficient access (quantity) to meet basic needs | Piped water | Well or spring on household | Rainwater Cisterns | Others |
| Piped water                                      | 1           | 1/3                         | 6                  | 8      |
| Well or spring on household                      | 3           | 1                           | 7                  | 9      |

|                                                               |             |                             |                    |        |
|---------------------------------------------------------------|-------------|-----------------------------|--------------------|--------|
| Rainwater Cisterns                                            | 1/6         | 1/7                         | 1                  | 3      |
| Others                                                        | 1/8         | 1/9                         | 1/3                | 1      |
| <b>Duration and intermittency of access</b>                   | Piped water | Well or spring on household | Rainwater Cisterns | Others |
| Piped water                                                   | 1           | 1/3                         | 8                  | 6      |
| Well or spring on household                                   | 3           | 1                           | 9                  | 7      |
| Rainwater Cisterns                                            | 1/8         | 1/9                         | 1                  | 1/3    |
| Others                                                        | 1/6         | 1/7                         | 3                  | 1      |
| <b>Access without microbiological contamination (E. coli)</b> | Piped water | Well or spring on household | Rainwater Cisterns | Others |
| Piped water                                                   | 1           | 5                           | 1/3                | 8      |
| Well or spring on household                                   | 1/5         | 1                           | 1/7                | 4      |
| Rainwater Cisterns                                            | 3           | 7                           | 1                  | 9      |
| Others                                                        | 1/8         | 1/4                         | 1/9                | 1      |
| <b>Potable water guarantee</b>                                | Piped water | Well or spring on household | Rainwater Cisterns | Others |
| Piped water                                                   | 1           | 5                           | 8                  | 9      |
| Well or spring on household                                   | 1/5         | 1                           | 5                  | 7      |
| Rainwater Cisterns                                            | 1/8         | 1/5                         | 1                  | 2      |
| Others                                                        | 1/9         | 1/7                         | 1/2                | 1      |
